# Supplementary material
Source: PubMed Central journal article supplement (PMC3738081)
Supplement: 10.3163.1536-5050.101.3.010.sg001.pdf [file 10.3163.1536-5050.101.3.010.sg001.pdf]

## Access of primary and secondary literature by health personnel in an academic health center: implications for open access

Lauren A. Maggio, MS(LIS); Ryan M. Steinberg, MSI; Laura Moorhead, MS; Bridget O'Brien,  
PhD; John Willinsky, PhD

---

### Table 4

Most common publication types of full-text views during 2011

---

Addresses  
Autobiography  
Bibliography  
Biography  
Case reports  
Classical article  
Clinical conference  
Clinical trial  
Clinical trial, phase I  
Clinical trial, phase II  
Clinical trial, phase III  
Clinical trial, phase IV  
Comment  
Comparative study  
Congresses  
Consensus development conference  
Consensus development conference, National Institutes of Health (NIH)  
Controlled clinical trial  
Corrected and republished article  
Duplicate publication  
Editorial  
English abstract  
Evaluation studies  
Guideline  
Historical article  
In vitro  
Interactive tutorial  
Interview  
Introductory journal article  
Journal article  
Lectures  
Legal cases  
Letter  
Meta-analysis  
Multicenter study  
News  
Newspaper article  
Overall  
Patient education handout  
Portraits  
Practice guideline

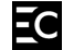

Randomized controlled trial  
Research support, American Recovery and Reinvestment Act  
Research support, NIH, extramural  
Research support, NIH, intramural  
Research support, non-US government  
Research support, US government, public health service (PHS)  
Research support, US government, non-PHS  
Retracted publication  
Retraction of publication  
Review  
Technical report  
Twin study  
Validation studies  
Video-audio media  
Webcasts

---
