# Supplementary material
Source: PubMed Central journal article supplement (PMC3738081)
Supplement: 10.3163.1536-5050.101.3.010.sg002.pdf [file 10.3163.1536-5050.101.3.010.sg002.pdf]

**Access of primary and secondary literature by health personnel in an academic health center: implications for open access**

**Lauren A. Maggio, MS(LIS); Ryan M. Steinberg, MSI; Laura Moorhead, MS; Bridget O'Brien, PhD; John Willinsky, PhD**

**Table 7**  
First quartile of journal titles accessed in 2011 (n=39)

| <b>Journal title</b>                                                 | <b>Views</b> |
|----------------------------------------------------------------------|--------------|
| <i>New England Journal of Medicine</i>                               | 2,070        |
| <i>Blood</i>                                                         | 1,746        |
| <i>Journal of Clinical Oncology</i>                                  | 1,689        |
| <i>American Journal of Surgical Pathology</i>                        | 1,016        |
| <i>Cancer</i>                                                        | 731          |
| <i>Pediatrics</i>                                                    | 720          |
| <i>Lancet</i>                                                        | 702          |
| <i>International Journal of Radiation Oncology, Biology, Physics</i> | 674          |
| <i>JAMA</i>                                                          | 625          |
| <i>British Journal of Haematology</i>                                | 563          |
| <i>Critical Care Medicine</i>                                        | 489          |
| <i>Clinical Infectious Diseases</i>                                  | 487          |
| <i>Circulation</i>                                                   | 483          |
| <i>Chest</i>                                                         | 468          |
| <i>Cochrane Database of Systematic Reviews (Online)</i>              | 452          |
| <i>Anesthesia and Analgesia</i>                                      | 440          |
| <i>Anesthesiology</i>                                                | 439          |
| <i>American Journal of Obstetrics and Gynecology</i>                 | 397          |
| <i>Gynecologic Oncology</i>                                          | 394          |
| <i>Obstetrics and Gynecology</i>                                     | 376          |
| <i>American Journal of Clinical Pathology</i>                        | 356          |
| <i>Leukemia</i>                                                      | 350          |
| <i>Neurology</i>                                                     | 337          |
| <i>Journal of Pediatrics</i>                                         | 326          |
| <i>Leukemia &amp; Lymphoma</i>                                       | 321          |
| <i>Transfusion</i>                                                   | 319          |
| <i>Journal of the American College of Cardiology</i>                 | 295          |
| <i>Neurosurgery</i>                                                  | 288          |
| <i>Annals of Internal Medicine</i>                                   | 280          |
| <i>Laryngoscope</i>                                                  | 280          |
| <i>American Journal of Health-System Pharmacy</i>                    | 276          |
| <i>Annals of Thoracic Surgery</i>                                    | 276          |
| <i>Pediatric Blood &amp; Cancer</i>                                  | 273          |
| <i>Lancet Oncology</i>                                               | 273          |
| <i>Paediatric Anaesthesia</i>                                        | 265          |
| <i>Journal of Urology</i>                                            | 258          |
| <i>American Journal of Hematology</i>                                | 257          |
| <i>Clinical Cancer Research</i>                                      | 257          |
| <i>Journal of Pediatric Surgery</i>                                  | 249          |
